# Supplementary material
Source: PubMed Central journal article supplement (PMC8262232)
Supplement: NIHMS1716174-supplement-1.pdf [file NIHMS1716174-supplement-1.pdf]

## Supplementary data (Ula V. Jurkunas et al.)

**Table 1. Antibodies Used for Immunofluorescence Staining (IF)**

| Antibodies                                                                | Source                           | Dilution |
|---------------------------------------------------------------------------|----------------------------------|----------|
| Cytokeratin 12 (L-20)                                                     | Santa Cruz (Santa Cruz, CA)      | 1:500    |
| Cytokeratin 3 (AE5)                                                       | Millipore (Billerica, MA)        | 1:100    |
| Cytokeratin 8 (E432)                                                      | Millipore (Billerica, MA)        | 1:100    |
| Cytokratin 14 (C-14)                                                      | Santa Cruz (Santa Cruz, CA)      | 1:200    |
| Cytokeratin 15 (LHK15)                                                    | Santa Cruz (Santa Cruz, CA)      | 1:250    |
| Pan-cytokeratins (PCK)<br>Recognizes cytokeratins 4, 5, 6, 8, 10, 13 & 18 | Millipore (Billerica, MA)        | 1:200    |
| E-cadherin (36/-E-cadherin)                                               | BD Biosciences                   | 1:2000   |
| Oct4 (Octamer-binding Protein 4)                                          | Abcam (Cambridge, MA)            | 1:100    |
| TRA-1-60                                                                  | Abcam (Cambridge, MA)            | 1:100    |
| SSEA4 (Stage Specific Embryonic Antigen)<br>(for immunofluorescence)      | Abcam (Cambridge, MA)            | 1:100    |
| SSEA4 (for separation and sorting)                                        | R&D Systems Inc.,<br>Minneapolis | 1:100    |
| N-cadherin                                                                | Santa Cruz (Santa Cruz, CA)      | 1:50     |
| Mouse monoclonal IgG                                                      | Millipore (Billerica, MA)        | 1:50     |
| Vimentin (5G3F10)                                                         | Santa Cruz (Santa Cruz, CA)      | 1:500    |
| Alexa Fluor 488 anti-mouse IgG                                            | Invitrogen (Carlsbad, CA)        | 1:1000   |
| Alexa Fluor 647 anti-Rabbit IgG                                           | Invitrogen (Carlsbad, CA)        | 1:1000   |

**Table 2. Assay ID and Probe Sequences Used for Real-time PCR**

| Gene Name                                          | Assay ID (Taqman Expression Assay) |
|----------------------------------------------------|------------------------------------|
| GAPDH                                              | Hs99999905_m1                      |
| p63                                                | Hs00978340_m1                      |
| K12                                                | Hs00165015_m1                      |
| ABCG2 (ATP-binding cassette sub-family G member 2) | Hs01053790_m1                      |
| K8                                                 | Hs01670053_m1                      |
| DSC1 (Desmoclin-1)                                 | Hs00245189_m1                      |
| DSG1 (Desmoglein-1)                                | Hs00170047_m1                      |
| Integrin, beta 1                                   | Hs00559595_m1                      |
| Oct4 (Octamer-binding Protein 4)                   | Hs00999634_gH                      |
| Nanog (Transcription Factors)                      | Hs04260366_g1                      |
| Sox2 (POU family binder Transcription Factors)     | Hs00415716_m1                      |
| Rex1 (Zinc-finger Transcription factor)            | Hs00381890_m1                      |
| Vim                                                | Hs00185584_m1                      |

## Supplementary data (Ula V. Jurkunas et al.)

**Table 3: Surface antigen profile of Unsorted LFs, LF SSEA4+, SSEA4-, and Unsorted BM MSCs by FACS Analysis.**

| Marker                   | Unsorted LFs  | LF SSEA4+     | LF SSEA4-     | Unsorted BM MSCs | Predominant expression |
|--------------------------|---------------|---------------|---------------|------------------|------------------------|
| CD106                    | 59.24 ± 0.25% | 58.54 ± 0.55% | 60.64 ± 0.45% | 59.44 ± 0.85%    | Mesenchymal stem cells |
| CD166                    | 88.24 ± 0.15% | 86.24 ± 0.45% | 88.74 ± 0.55% | 84.34 ± 0.55%    | Mesenchymal stem cells |
| CD71                     | 69.07 ± 6.57% | 64.34 ± 0.57% | 69.83 ± 0.77% | 49.73 ± 0.83%    | Mesenchymal stem cells |
| CD90                     | 95 ± 0.8 %    | 96 ± 0.2%     | 96 ± 0.5%     | 94.7 ± 3.00 %    | Mesenchymal stem cells |
| CD29                     | 85.6 ± 1.2 %  | 85.2 ± 1.2%   | 84.6±1.3%     | 84.0 ± 1.65 %    | Mesenchymal stem cells |
| CD34                     | 0.10 ± 0.05 % | 0.9 ± 0.02 %  | 0.15 ± 0.04%  | 0.13 ± 0.02 %    | Endothelial cells      |
| CD45                     | Negative      | Negative      | Negative      | 0.8 ± 0.2 %      | Hematopoietic cells    |
| CD11b                    | 0.51 %        | 0.5 ± 0.2%    | 0.51 ± 0.42%  | 0.35 ± 0.3 %     | Microglial cells       |
| CK3, CK12, CK10 and CK15 | Negative      | Negative      | Negative      | Negative         | Epithelial cells       |

\* Results represent percentage of expression of a marker (average values of n=3, ± standard deviation).

## Supplementary data (Ula V. Jurkunas et al.)

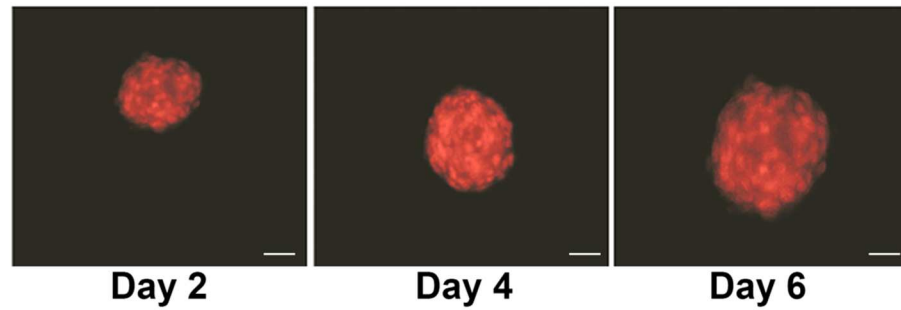

**Supplementary Figure S1:** LF SSEA4<sup>+</sup> cell sphere formation assay. Spheres were labeled with BrdU 24 hours before fixation at days 2, 4, and 6 to detect dividing cells (10 x magnification).

## Supplementary data (Ula V. Jurkunas et al.)

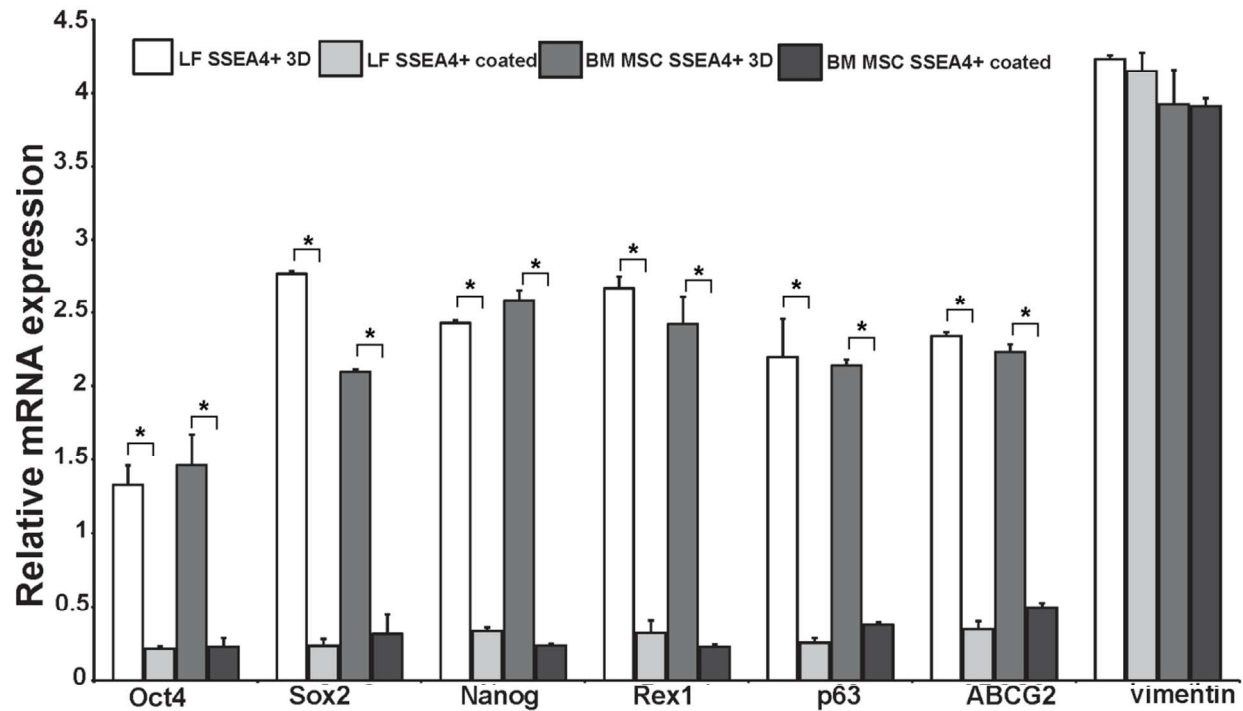

**Supplementary Figure S2:** Comparison of stem cell marker expression between 3D Matrigel and thin-coated Matrigel culture systems. The data represent the mean  $\pm$  SEM from 6 experiments. Statistical analysis was performed using Two tailed Student's *t* test ( $*p < 0.05$ ).

## Supplementary data (Ula V. Jurkunas et al.)

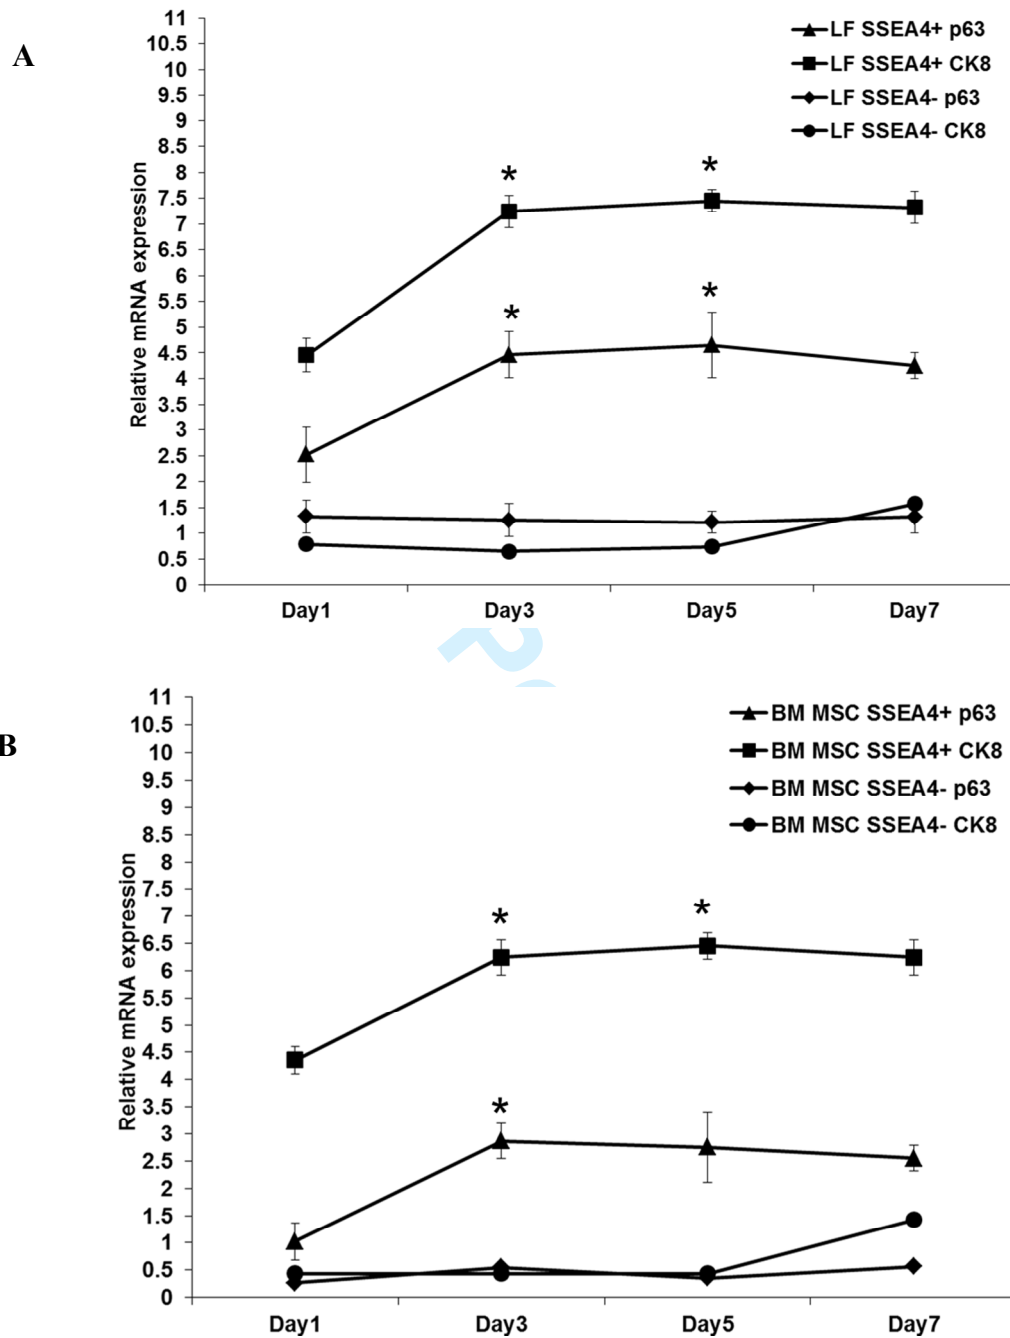

**Supplementary Figure S3:** Ectodermal induction of LFs and BM MSCs. **(A):** LFs and **(B):** BM MSCs; mRNA levels of p63 and CK8, determined at 1, 3, 5, and 7 days post induction. The marker levels increased to their highest levels between days 3 and 5 as compared to day 1 of induction. The data represent the mean  $\pm$  SEM from 3 experiments. Statistical analysis was performed using Two tailed Student's *t* test ( $*p < 0.05$ ).

## Supplementary data (Ula V. Jurkunas et al.)

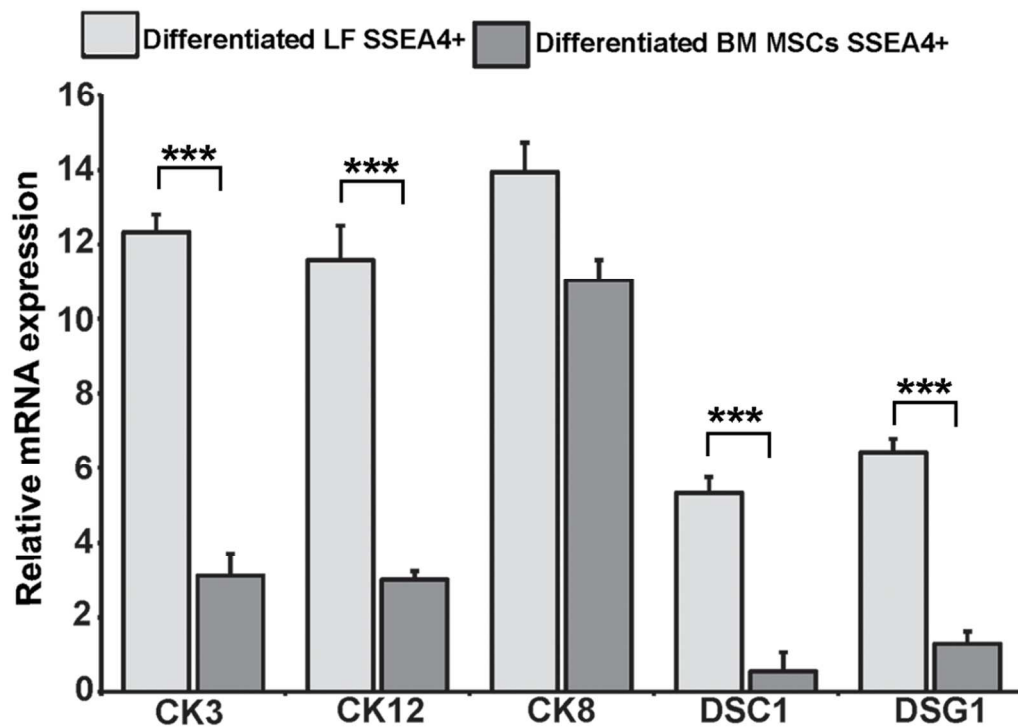

**Supplementary Figure S4:** Differentiation of LF SSEA4+ and BM MSC SSEA4+ cells into corneal epithelial cells. LF SSEA4+ cells show a higher significant differentiation potential into corneal epithelial cells than do BM MSC SSEA4+ cells. The data represent the mean  $\pm$  SEM from 6 experiments. Statistical analysis was performed using Two tailed Student's *t* test. (\*\*\*)  $p < 0.001$ .
